# Supplementary material for: Nanoparticles Engineered with Rituximab and Loaded with Nutlin-3 Show Promising Therapeutic Activity in B-Leukemic Xenografts
Source: Oxford University Press journal article supplement (doi:10.1158/1078-0432.ccr-13-0015), 2013-05-29
Supplement: 10780432ccr130015-sup-tab1.pdf [file 10780432ccr130015-sup-tab1.pdf]

**Supplementary Table 1. Physicochemical properties and technological characterization of the NP-Nut, NP-Rt and NP-Rt-Nut preparations.**

| <b>Samples</b>   | <b>Size (nm)</b> | <b>PDI</b>   | <b>z- potential (mV)</b> | <b>% PVA residual</b> | <b>[EE]<sup>a</sup> (%)</b> | <b>Drug content<sup>b</sup> (%)</b> |
|------------------|------------------|--------------|--------------------------|-----------------------|-----------------------------|-------------------------------------|
| <b>NP</b>        | 179 (14)         | 0.04 (0.003) | -13 (3)                  | 6.7 (0.3)             |                             |                                     |
| <b>NP-Nut</b>    | 189 (15)         | 0.08 (0.02)  | -3 (1)                   | 6.7 (0.3)             | 59 (7)                      | 5.0 (0.7)                           |
| <b>NP-Rt</b>     | 212 (14)         | 0.18 (0.02)  | - 12 (2)                 | 4.5 (0.4)             |                             |                                     |
| <b>NP-Rt-Nut</b> | 223 (16)         | 0.12 (0.02)  | - 10 (4)                 | 3.4 (0.2)             | 44 (8)                      | 4.0 (0.8)                           |

Values are means±SD (*n*=9). PDI: polydispersivity index; PVA: polyvinyl alcohol; EE: encapsulation efficiency; Nut, Nutlin-3; Rt, Rituximab.

<sup>a</sup>The percentage of EE was determined as the ratio of the encapsulated out of the total (encapsulated+free) drug. <sup>b</sup>The percentage of drug content was expressed as the ratio of the encapsulated drug out of the total mass (encapsulated drug+ polymer).
